# Supplementary material for: Sisal xylem fibre-based activated carbon fibres for fuel adsorption: effect of thermal stabilization of diammonium phosphate
Source: R Soc Open Sci. 2020 Sep 9;7(9):200966. doi: 10.1098/rsos.200966 (PMC7540773; doi:10.1098/rsos.200966)
Supplement: SACF vs GAC BWC [file rsos200966supp1.xlsx]

## Sheet: b_zqkh
Sample:		1#	DAP20		2#	GAC
Time		PID	Mass		PID	Mass
0		0	0		0	0
0.5		0	0		0	0
1		0	0		0	0
1.5		0	0		1.1	0.0412194
2		0	0		2.1	0.0786915
2.5		1.1	0.0412194		2.9	0.108669
3		3.5	0.131153		4	0.149889
3.5		4.8	0.179866		5.1	0.191108
4		6.1	0.22858		6.1	0.22858
4.5		8.3	0.311019		8.3	0.311019
5		10.9	0.408446		9.6	0.359733
5.5		12.5	0.468402		10.9	0.408446
6		14.7	0.550841		12.5	0.468402
6.5		16.5	0.61829		14.4	0.539599
7		17.1	0.640774		15.7	0.588313
7.5		17.6	0.65951		17.1	0.640774
8		17.3	0.648268		17.6	0.65951
8.5		17.3	0.648268		17.6	0.65951
9		17.6	0.65951		17.6	0.65951
9.5		17.6	0.65951		17.6	0.65951
10		17.6	0.65951		17.6	0.65951
10.5		17.3	0.648268		17.3	0.648268
11		17.6	0.65951		17.6	0.65951
11.5		17.9	0.670751		17.6	0.65951
12		17.6	0.65951		17.6	0.65951
12.5		17.6	0.65951		17.6	0.65951
13		17.3	0.648268		17.6	0.65951
13.5		17.6	0.65951		17.6	0.65951
14		17.6	0.65951		17.9	0.670751
14.5		17.6	0.65951		17.6	0.65951
15		17.6	0.65951		17.6	0.65951
15.5		17.6	0.65951		16.5	0.61829
16		13.6	0.509621		14.4	0.539599
16.5		11.2	0.419688		11.5	0.43093
17		7.7	0.288535		9.6	0.359733
17.5		3.5	0.131153		7.7	0.288535
18		0.8	0.0299777		5.9	0.221086
18.5		0.5	0.0187361		4.3	0.16113
19		0.3	0.0112416		2.9	0.108669
19.5		0	0		1.6	0.0599554
20		0	0		0.8	0.0299777
20.5		0.3	0.0112416		0.3	0.0112416
21		0.5	0.0187361		0	0
21.5		0	0		0	0
22		0	0		0	0
22.5		0	0		0.3	0.0112416
23		0	0		0	0
23.5		0	0		0	0
24		0.3	0.0112416		0	0
24.5		0	0		0	0
25		0	0		0.3	0.0112416
25.5		0.3	0.0112416		0	0
26		0	0		0	0
26.5		0	0		0	0
27		0	0		0	0
27.5		0	0		0.3	0.0112416
28		0	0		0	0
28.5		0.3	0.0112416		0	0
29		0	0		0	0
29.5		0	0		0.3	0.0112416
30		0	0		0	0
30.5		0.3	0.0112416		0	0
31		0	0		0	0
31.5		0	0		0	0
32		0	0		0	0
32.5		0	0		0	0
33		0	0		0.3	0.0112416
33.5		0	0		0	0
34		0	0		0	0
34.5		0	0		0	0
35		0	0		0	0
35.5		0	0		0	0
36		0	0		0	0
36.5		0	0		0	0
37		0	0		0	0
37.5		0	0		0	0
38		0	0		0	0
38.5		0	0		0	0
39		0	0		0	0
39.5		0	0		0	0
40		0	0		0	0
40.5		0	0		0	0
41		0	0		0	0
41.5		0	0		0	0
42		0	0		0	0
42.5		0	0		0	0
43		0	0		0	0
43.5		0	0		0	0
44		0	0		0	0
44.5		0	0		0	0
45		0	0		0	0
45.5		0	0		0	0
46		0	0		0	0
46.5		0	0		0	0
47		0	0		0	0
47.5		0	0		0	0
48		0	0		0	0
48.5		0	0		0	0
49		0	0		0	0
49.5		0	0		0	0
50		0	0		0	0
50.5		0	0		0	0
51		0	0		0	0
51.5		0	0		0	0
52		0	0		0	0
52.5		0	0		0	0
53		0	0		0	0
53.5		0	0		0	0
54		0	0		0	0
54.5		0	0		0	0
55		0	0		0	0
55.5		0	0		0	0
56		0	0		0	0
56.5		0	0		0	0
57		0	0		0.5	0.0187361
57.5		1.3	0.0487138		2.4	0.0899331
58		3.7	0.138647		3.7	0.138647
58.5		5.3	0.198602		4.8	0.179866
59		6.9	0.258558		6.1	0.22858
59.5		9.1	0.340996		7.5	0.281041
60		10.9	0.408446		9.1	0.340996
60.5		12.5	0.468402		9.9	0.370974
61		14.4	0.539599		11.2	0.419688
61.5		15.7	0.588313		13.1	0.490885
62		16.8	0.629532		14.4	0.539599
62.5		17.6	0.65951		16.3	0.610796
63		17.6	0.65951		17.6	0.65951
63.5		17.3	0.648268		17.3	0.648268
64		17.6	0.65951		17.6	0.65951
64.5		17.6	0.65951		17.6	0.65951
65		17.6	0.65951		17.6	0.65951
65.5		17.9	0.670751		17.6	0.65951
66		17.6	0.65951		17.6	0.65951
66.5		17.6	0.65951		17.6	0.65951
67		17.6	0.65951		17.9	0.670751
67.5		17.6	0.65951		17.6	0.65951
68		17.6	0.65951		17.6	0.65951
68.5		17.6	0.65951		17.6	0.65951
69		17.3	0.648268		17.6	0.65951
69.5		17.6	0.65951		17.6	0.65951
70		17.6	0.65951		17.6	0.65951
70.5		17.6	0.65951		17.6	0.65951
71		17.1	0.640774		17.1	0.640774
71.5		13.3	0.49838		15.2	0.569577
72		9.9	0.370974		12.3	0.460907
72.5		6.4	0.239822		9.3	0.348491
73		2.7	0.101175		6.7	0.251063
73.5		1.1	0.0412194		3.5	0.131153
74		0.5	0.0187361		1.6	0.0599554
74.5		0.3	0.0112416		0.5	0.0187361
75		0	0		0	0
75.5		0	0		0	0
76		0	0		0	0
76.5		0.3	0.0112416		0	0
77		0	0		0	0
77.5		0.5	0.0187361		0	0
78		0	0		0	0
78.5		0	0		0	0
79		0.5	0.0187361		0.3	0.0112416
79.5		0.3	0.0112416		0	0
80		0	0		0	0
80.5		0	0		0	0
81		0	0		0	0
81.5		0.5	0.0187361		0	0
82		0	0		0.3	0.0112416
82.5		0	0		0	0
83		0	0		0.3	0.0112416
83.5		0	0		0	0
84		0	0		0	0
84.5		0.3	0.0112416		0	0
85		0	0		0	0
85.5		0	0		0	0
86		0	0		0	0
86.5		0	0		0	0
87		0	0		0	0
87.5		0.3	0.0112416		0	0
88		0	0		0	0
88.5		0	0		0	0
89		0	0		0.3	0.0112416
89.5		0	0		0	0
90		0	0		0	0
90.5		0	0		0	0
91		0	0		0	0
91.5		0	0		0	0
92		0	0		0	0
92.5		0	0		0	0
93		0	0		0	0
93.5		0	0		0	0
94		0	0		0	0
94.5		0	0		0	0
95		0	0		0	0
95.5		0	0		0	0
96		0	0		0	0
96.5		0	0		0	0
97		0	0		0	0
97.5		0	0		0	0
98		0	0		0	0
98.5		0	0		0	0
99		0	0		0	0
99.5		0	0		0	0
100		0	0		0	0
100.5		0	0		0	0
101		0	0		0	0
101.5		0	0		0	0
102		0	0		0	0
102.5		0	0		0	0
103		0	0		0	0
103.5		0	0		0	0
104		0	0		0	0
104.5		0	0		0	0
105		0	0		0	0
105.5		0	0		0	0
106		0	0		0	0
106.5		0	0		0	0
107		0	0		0	0
107.5		0	0		0	0
108		0	0		0	0
108.5		0	0		0	0
109		0	0		0	0
109.5		0	0		0	0
110		0	0		0	0
110.5		0	0		0	0
111		0	0		0	0
111.5		0	0		0	0
112		0	0		0	0
112.5		0.5	0.0187361		0	0
113		3.5	0.131153		2.1	0.0786915
113.5		4.8	0.179866		4	0.149889
114		6.7	0.251063		5.9	0.221086
114.5		8.5	0.318513		7.5	0.281041
115		10.9	0.408446		8.8	0.329755
115.5		12.8	0.479643		10.9	0.408446
116		14.4	0.539599		12.8	0.479643
116.5		16.5	0.61829		14.4	0.539599
117		17.6	0.65951		16.5	0.61829
117.5		17.6	0.65951		17.6	0.65951
118		17.6	0.65951		17.6	0.65951
118.5		17.6	0.65951		17.6	0.65951
119		17.6	0.65951		17.6	0.65951
119.5		17.9	0.670751		17.6	0.65951
120		17.6	0.65951		17.6	0.65951
120.5		17.3	0.648268		17.3	0.648268
121		17.6	0.65951		17.6	0.65951
121.5		17.6	0.65951		17.6	0.65951
122		17.6	0.65951		17.9	0.670751
122.5		17.6	0.65951		17.3	0.648268
123		17.3	0.648268		17.3	0.648268
123.5		17.6	0.65951		17.6	0.65951
124		17.6	0.65951		17.6	0.65951
124.5		17.6	0.65951		17.6	0.65951
125		17.6	0.65951		17.6	0.65951
125.5		17.6	0.65951		17.6	0.65951
126		17.6	0.65951		17.6	0.65951
126.5		16.3	0.610796		16.3	0.610796
127		12.8	0.479643		12.8	0.479643
127.5		9.3	0.348491		9.3	0.348491
128		6.4	0.239822		6.4	0.239822
128.5		3.2	0.119911		3.2	0.119911
129		0.5	0.0187361		2.4	0.0899331
129.5		0.3	0.0112416		0.5	0.0187361
130		0	0		0	0
130.5		0.8	0.0299777		0.8	0.0299777
131		0	0		0	0
131.5		0.3	0.0112416		0	0
132		0	0		0	0
132.5		0	0		0.3	0.0112416
133		0	0		0	0
133.5		0	0		0	0
134		0	0		0	0
134.5		0	0		0	0
135		0.8	0.0299777		0	0
135.5		0	0		0	0
136		0	0		0.3	0.0112416
136.5		0	0		0	0
137		0.3	0.0112416		0	0
137.5		0	0		0	0
138		0	0		0	0
138.5		0	0		0	0
139		0	0		0	0
139.5		0.8	0.0299777		0	0
140		0	0		0.3	0.0112416
140.5		0	0		0	0
141		0	0		0	0
141.5		0	0		0	0
142		0	0		0	0
142.5		0	0		0	0
143		0.3	0.0112416		0	0
143.5		0	0		0	0
144		0	0		0.3	0.0112416
144.5		0	0		0	0
145		0	0		0	0
145.5		0	0		0	0
146		0	0		0	0
146.5		0	0		0	0
147		0	0		0	0
147.5		0	0		0	0
148		0	0		0	0
148.5		0	0		0	0
149		0	0		0	0
149.5		0	0		0	0
150		0	0		0	0
150.5		0	0		0	0
151		0	0		0	0
151.5		0	0		0	0
152		0	0		0	0
152.5		0	0		0	0
153		0	0		0	0
153.5		0	0		0	0
154		0	0		0	0
154.5		0	0		0	0
155		0	0		0	0
155.5		0	0		0	0
156		0	0		0	0
156.5		0	0		0	0
157		0	0		0	0
157.5		0	0		0	0
158		0	0		0	0
158.5		0	0		0	0
159		0	0		0	0
159.5		0	0		0	0
160		0	0		0	0
160.5		0	0		0	0
161		0	0		0	0
161.5		0	0		0	0
162		0	0		0	0
162.5		0	0		0	0
163		0	0		0	0
163.5		0	0		0	0
164		0	0		0	0
164.5		0	0		0	0
165		0	0		0	0
165.5		0	0		0	0
166		0	0		0	0
166.5		0	0		0	0
167		0	0		0	0
167.5		0	0		0	0
168		1.1	0.0412194		0	0
168.5		3.7	0.138647		1.6	0.0599554
169		5.6	0.209844		4.3	0.16113
169.5		8.5	0.318513		6.7	0.251063
170		10.9	0.408446		9.6	0.359733
170.5		12.8	0.479643		12.5	0.468402
171		14.9	0.558335		15.2	0.569577
171.5		16.3	0.610796		17.1	0.640774
172		17.6	0.65951		17.6	0.65951
172.5		17.6	0.65951		17.6	0.65951
173		17.6	0.65951		17.6	0.65951
173.5		17.6	0.65951		17.6	0.65951
174		17.9	0.670751		17.6	0.65951
174.5		17.6	0.65951		17.6	0.65951
175		17.6	0.65951		17.6	0.65951
175.5		17.6	0.65951		17.6	0.65951
176		17.6	0.65951		17.3	0.648268
176.5		17.6	0.65951		17.6	0.65951
177		17.6	0.65951		17.6	0.65951
177.5		17.3	0.648268		17.6	0.65951
178		17.6	0.65951		17.6	0.65951
178.5		17.6	0.65951		17.6	0.65951
179		17.6	0.65951		17.6	0.65951
179.5		17.3	0.648268		17.6	0.65951
180		17.6	0.65951		17.9	0.670751
180.5		17.6	0.65951		17.6	0.65951
181		17.6	0.65951		17.6	0.65951
181.5		17.6	0.65951		17.6	0.65951
182		16	0.599554		15.2	0.569577
182.5		11.7	0.438424		11.5	0.43093
183		8.3	0.311019		7.7	0.288535
183.5		5.1	0.191108		4.8	0.179866
184		2.1	0.0786915		2.1	0.0786915
184.5		0.3	0.0112416		0.8	0.0299777
185		0	0		0	0
185.5		0	0		0	0
186		0.5	0.0187361		0.5	0.0187361
186.5		0	0		0	0
187		0.5	0.0187361		0	0
187.5		0	0		0	0
188		0	0		0	0
188.5		0	0		0	0
189		0.3	0.0112416		0.3	0.0112416
189.5		0	0		0	0
190		0.3	0.0112416		0	0
190.5		0.8	0.0299777		0	0
191		0	0		0	0
191.5		0	0		0	0
192		0	0		0	0
192.5		0.3	0.0112416		0	0
193		0	0		0.3	0.0112416
193.5		0	0		0	0
194		0.3	0.0112416		0	0
194.5		0	0		0	0
195		0	0		0	0
195.5		0	0		0	0
196		0	0		0	0
196.5		0.3	0.0112416		0	0
197		0	0		0	0
197.5		0	0		0	0
198		0	0		0	0
198.5		0	0		0	0
199		0	0		0	0
199.5		0	0		0	0
200		0	0		0	0
200.5		0.3	0.0112416		0.3	0.0112416
201		0	0		0	0
201.5		0	0		0	0
202		0	0		0	0
202.5		0	0		0	0
203		0	0		0	0
203.5		0	0		0	0
204		0	0		0	0
204.5		0	0		0	0
205		0	0		0	0
205.5		0	0		0	0
206		0	0		0	0
206.5		0	0		0	0
207		0	0		0	0
207.5		0	0		0	0
208		0	0		0	0
208.5		0	0		0	0
209		0	0		0	0
209.5		0	0		0	0
210		0	0		0	0
210.5		0	0		0	0
211		0	0		0	0
211.5		0	0		0	0
212		0	0		0	0
212.5		0	0		0	0
213		0	0		0	0
213.5		0	0		0	0
214		0	0		0	0
214.5		0	0		0	0
215		0	0		0	0
215.5		0	0		0	0
216		0	0		0	0
216.5		0	0		0	0
217		0	0		0	0
217.5		0	0		0	0
218		0	0		0	0
218.5		0	0		0	0
219		0	0		0	0
219.5		0	0		0	0
220		0	0		0	0
220.5		0	0		0	0
221		0	0		0	0
221.5		0	0		0	0
222		0	0		0	0
222.5		0	0		0	0
223		0	0		0	0
223.5		1.3	0.0487138		0	0
224		4.3	0.16113		1.9	0.0711971
224.5		6.1	0.22858		4.3	0.16113
225		8.3	0.311019		7.2	0.269799
225.5		11.5	0.43093		9.9	0.370974
226		13.9	0.520863		12.5	0.468402
226.5		16.3	0.610796		15.5	0.580818
227		17.6	0.65951		17.6	0.65951
227.5		17.6	0.65951		17.6	0.65951
228		17.6	0.65951		17.6	0.65951
228.5		17.6	0.65951		17.6	0.65951
229		17.6	0.65951		17.6	0.65951
229.5		17.6	0.65951		17.6	0.65951
230		17.6	0.65951		17.6	0.65951
230.5		17.6	0.65951		17.9	0.670751
231		17.6	0.65951		17.6	0.65951
231.5		17.9	0.670751		17.6	0.65951
232		17.3	0.648268		17.6	0.65951
232.5		17.6	0.65951		17.6	0.65951
233		17.6	0.65951		17.6	0.65951
233.5		17.6	0.65951		17.3	0.648268
234		17.6	0.65951		17.9	0.670751
234.5		17.3	0.648268		17.6	0.65951
235		17.6	0.65951		17.6	0.65951
235.5		17.6	0.65951		17.6	0.65951
236		17.6	0.65951		17.6	0.65951
236.5		17.6	0.65951		17.6	0.65951
237		17.6	0.65951		17.6	0.65951
237.5		14.1	0.528357		14.7	0.550841
238		11.2	0.419688		11.7	0.438424
238.5		7.7	0.288535		7.7	0.288535
239		4.5	0.168625		4.8	0.179866
239.5		1.3	0.0487138		1.9	0.0711971
240		0.5	0.0187361		0.3	0.0112416
240.5		0	0		0	0
241		0	0		0	0
241.5		0	0		0	0
242		0	0		0	0
242.5		0	0		0	0
243		0.5	0.0187361		0	0
243.5		0.3	0.0112416		0	0
244		0	0		0.3	0.0112416
244.5		0	0		0	0
245		0	0		0	0
245.5		0	0		0	0
246		0.3	0.0112416		0	0
246.5		0	0		0	0
247		0	0		0.3	0.0112416
247.5		0.3	0.0112416		0	0
248		0	0		0	0
248.5		0	0		0	0
249		0.5	0.0187361		0	0
249.5		0	0		0.3	0.0112416
250		0	0		0	0
250.5		0.3	0.0112416		0	0
251		0	0		0	0
251.5		0	0		0.3	0.0112416
252		0.5	0.0187361		0	0
252.5		0	0		0	0
253		0.3	0.0112416		0	0
253.5		0	0		0	0
254		0	0		0	0
254.5		0	0		0	0
255		0.3	0.0112416		0	0
255.5		0	0		0	0
256		0	0		0	0
256.5		0	0		0	0
257		0	0		0	0
257.5		0.3	0.0112416		0.3	0.0112416
258		0	0		0	0
258.5		0	0		0	0
259		0	0		0	0
259.5		0	0		0	0
260		0	0		0	0
260.5		0	0		0	0
261		0	0		0	0
261.5		0	0		0	0
262		0	0		0	0
262.5		0	0		0	0
263		0	0		0	0
263.5		0	0		0	0
264		0	0		0	0
264.5		0	0		0	0
265		0	0		0	0
265.5		0	0		0	0
266		0	0		0	0
266.5		0	0		0	0
267		0	0		0	0
267.5		0	0		0	0
268		0	0		0	0
268.5		0	0		0	0
269		0	0		0	0
269.5		0	0		0	0
270		0	0		0	0
270.5		0	0		0	0
271		0	0		0	0
271.5		0	0		0	0
272		0	0		0	0
272.5		0	0		0	0
273		0	0		0	0
273.5		0	0		0	0
274		0	0		0	0
274.5		0	0		0	0
275		0	0		0	0
275.5		0	0		0	0
276		0	0		0	0
276.5		0	0		0	0
277		0	0		0	0
